# Supplementary material
Source: PubMed Central journal article supplement (PMC5923139)
Supplement: AAC.02178-17_zac005187128s1.pdf [file AAC.02178-17_zac005187128s1.pdf]

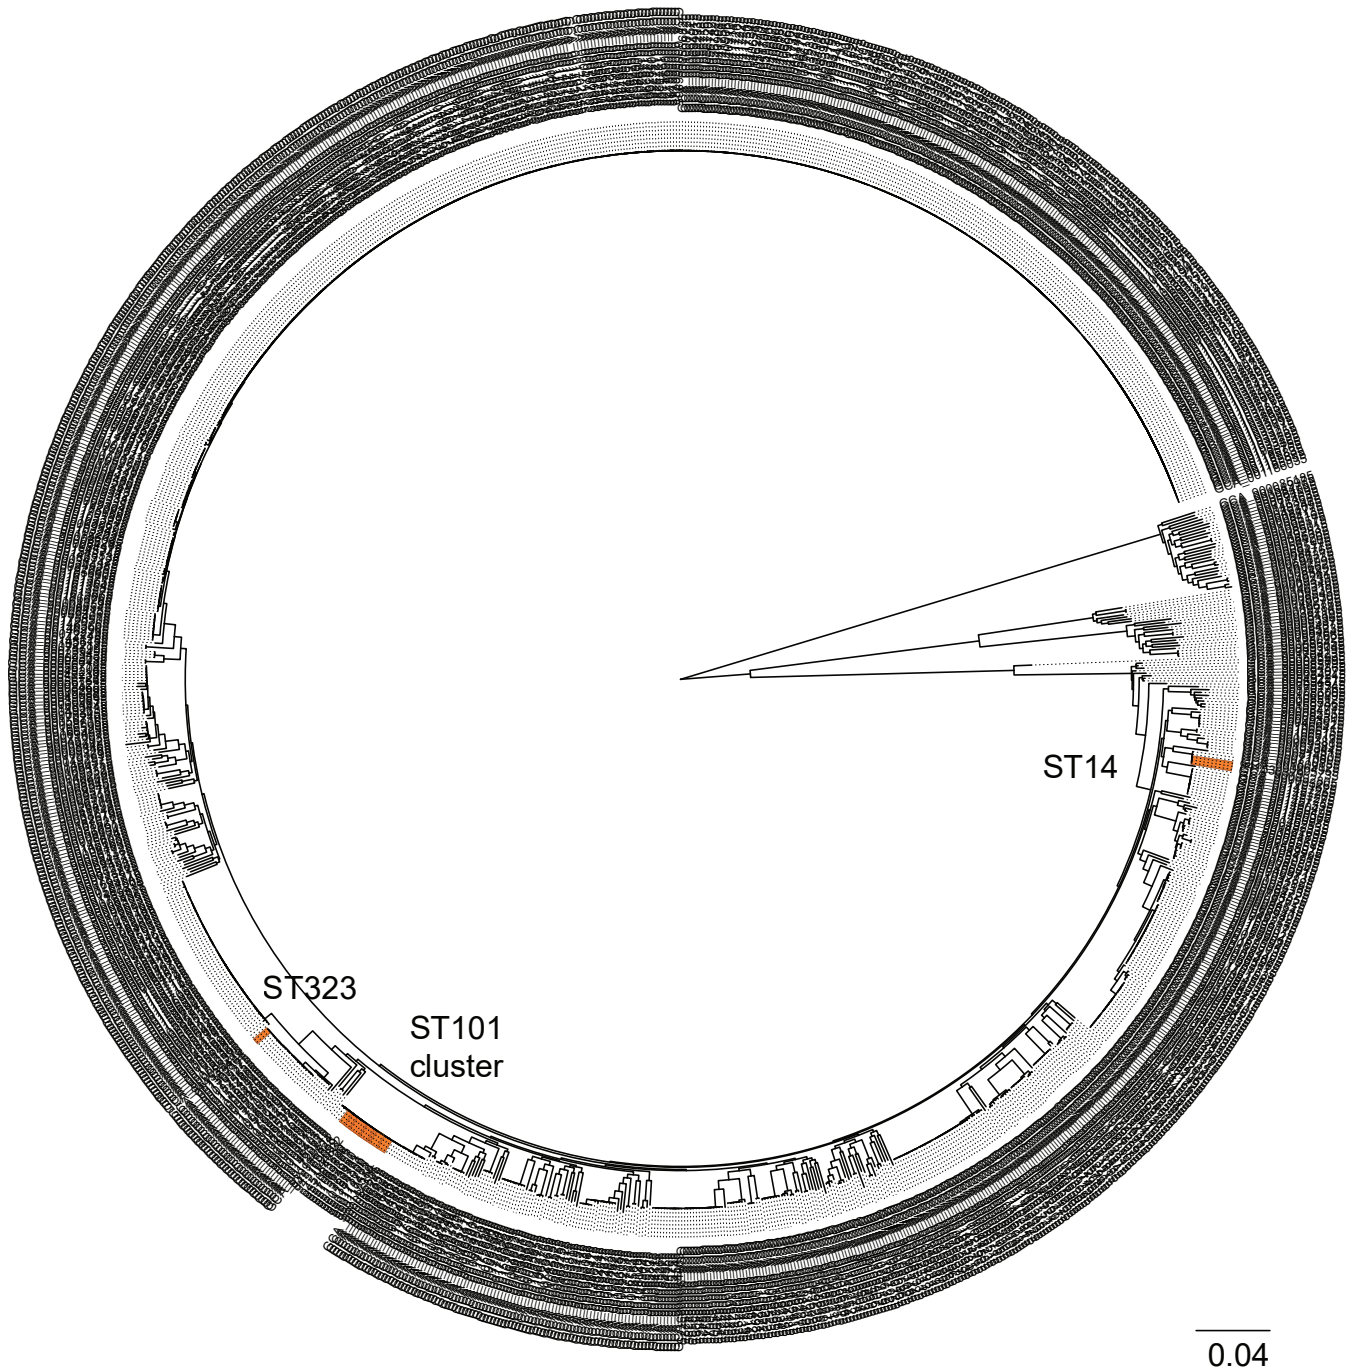

**FIG S1** *Klebsiella pneumoniae* global phylogeny revealed by rapid core genome multi-alignment (<https://github.com/marbl/parsnp>). Assembly dataset from this study ( $n=20$ ; orange) was analyzed together with datasets from the PATRIC database ( $n=1148$ ). The positions of main cluster isolates of ST101 ( $n=18$ ) and the ST14 and ST323 isolates from this study are marked in the tree.

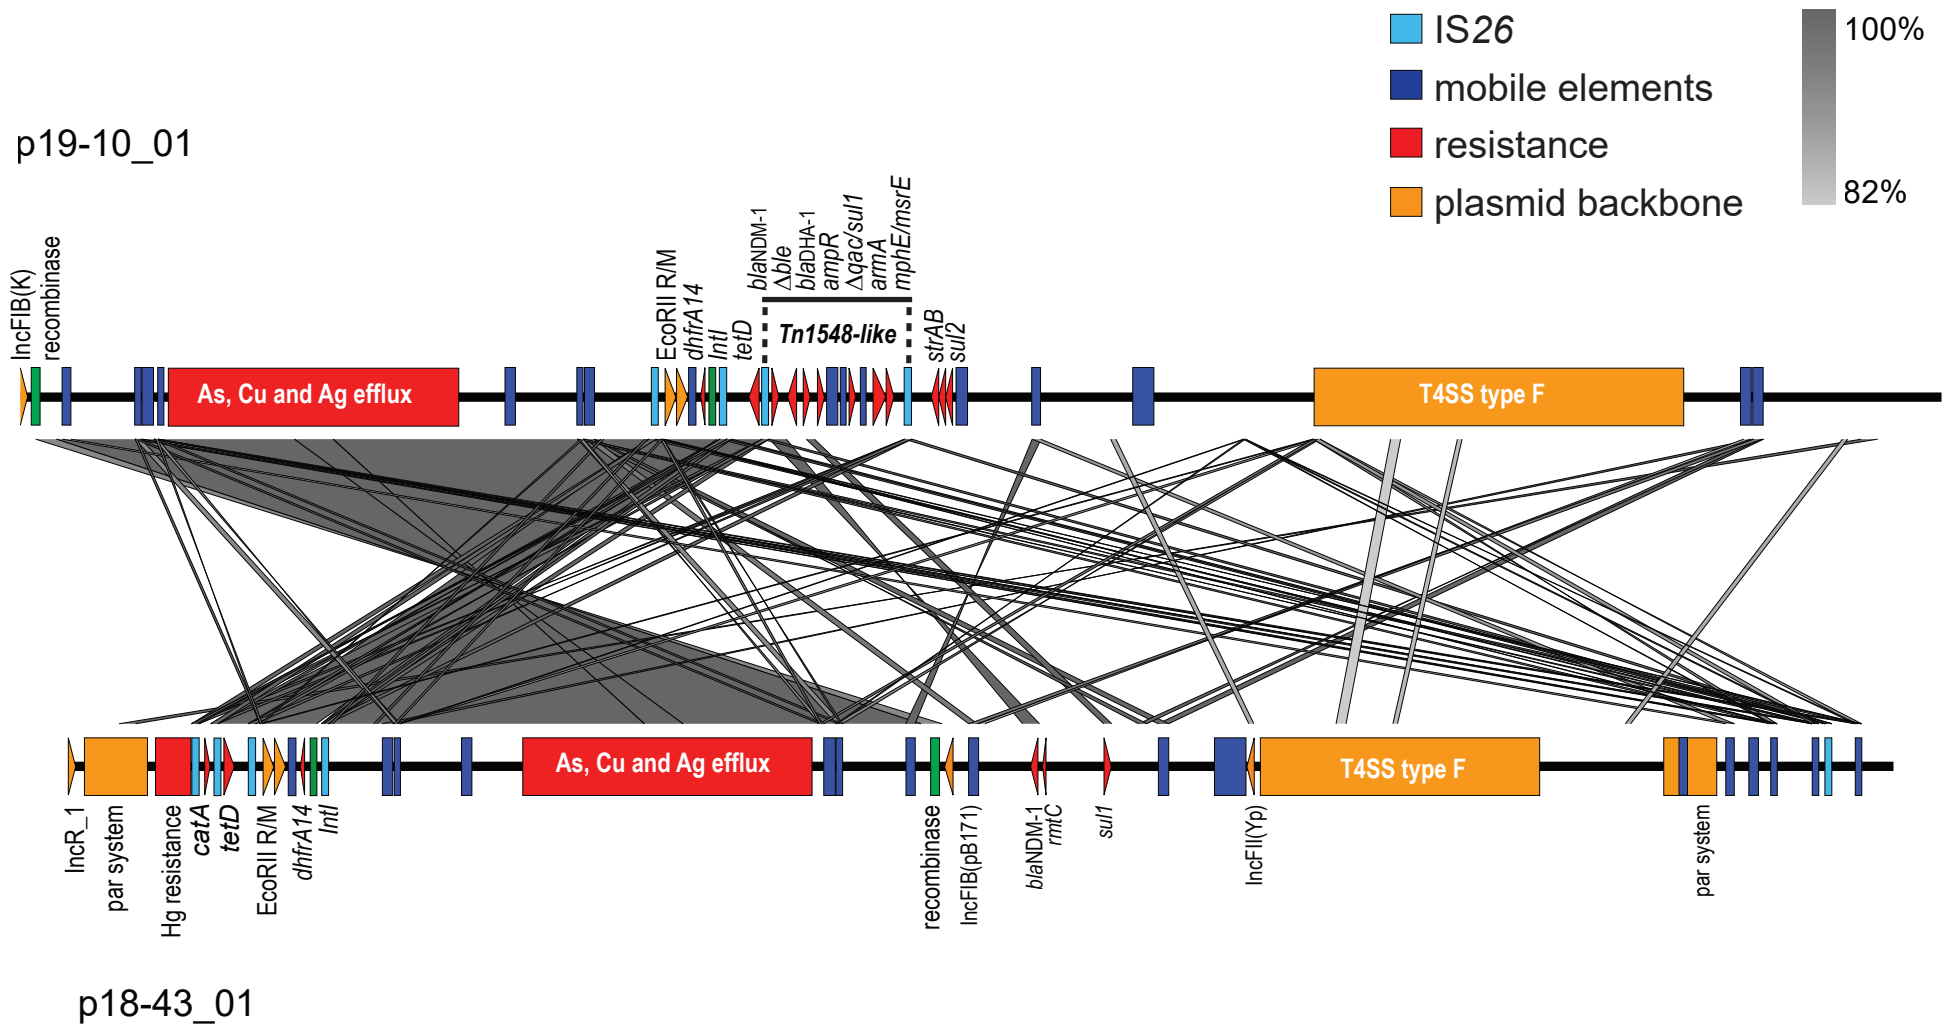

**FIG S2** Linear genetic map showing BLAST alignment of the NDM-1 encoding plasmids p19-10\_01 and p18-43\_01. Homologous regions are indicated (black-grey scale as shown). Resistance-encoding genes (red) and plasmid backbone elements (orange) are indicated by arrows pointing in the direction of transcription or by blocks when multiple genes. The IS26 elements (IS6 family) are marked as light blue boxes and other mobile elements as dark blue. The Tn1548-like region of p19-10\_01 is marked.

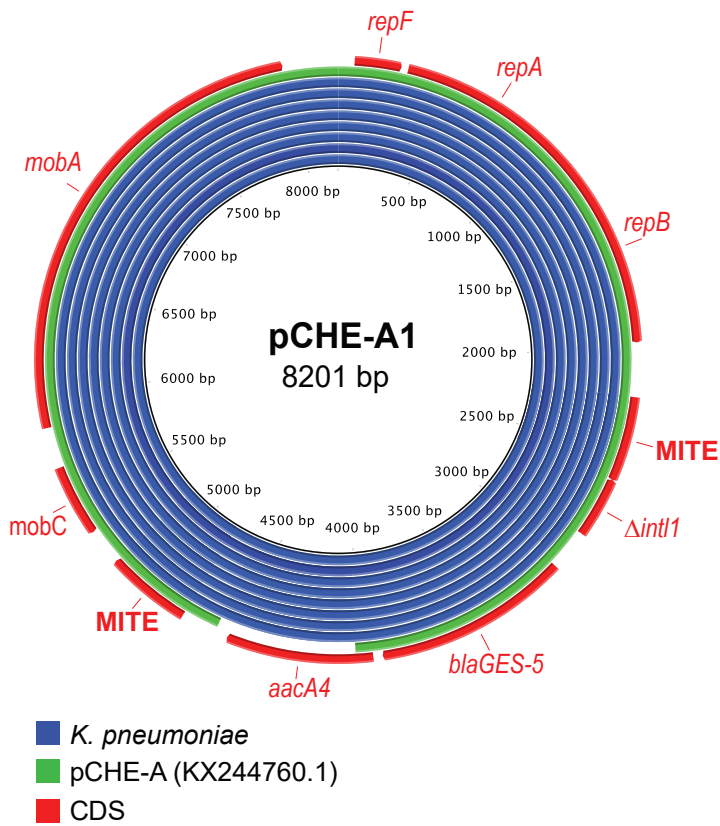

**FIG S3** Tracking of the pCHE-A1 plasmid in subgroup I *K. pneumoniae*. The map was constructed using BLAST Ring Image Generator (BRIG) software. The concentric blue circles represent BLAST comparisons between pCHE-A1 and genome assemblies from *K. pneumoniae* 939996824, 945154233, 945165838, 945169659, 957083320, U44822 and 957083896, starting with the innermost circle. The green circle represent a comparison with pCHE-A, which is lacking *aacA4*, and the outer red circle shows the annotated CDS with the miniature inverted transposable elements (MITE) on each side of the *bla<sub>GES-5</sub>* and *aacA4* genes indicated.

**TABLE S1** Relevant patient data, source of specimens, phenotypic and genotypic characteristics of the CRE from Durban, South Africa

| Isolate <sup>*</sup><br>No.         | StrainID  | Patient's      |             | Isolate's       | Source             | Hospital ward    | Carba NP <sup>†</sup> | β-lactamase genes                                    | MLST             |
|-------------------------------------|-----------|----------------|-------------|-----------------|--------------------|------------------|-----------------------|------------------------------------------------------|------------------|
|                                     |           | Sex            | Age (years) | Date            |                    |                  |                       |                                                      |                  |
| <i>Escherichia coli</i> (n=1)       |           |                |             |                 |                    |                  |                       |                                                      |                  |
| 1                                   | 947385799 | M <sup>‡</sup> | 44          | 29/05/2013      | Urine              | O/P              | +                     | NDM-5, CMY-42-like                                   | ST167            |
| <i>Klebsiella pneumoniae</i> (n=21) |           |                |             |                 |                    |                  |                       |                                                      |                  |
| 2                                   | 944535499 | F <sup>§</sup> | 60          | X <sup>**</sup> | Urine              | J/3 (surgical)   | -                     | OXA-232, OXA-1, CTX-M-15, SHV-28-like                | ST14             |
| 3                                   | 939996824 | M              | 64          | 29-01-2013      | Pus                | G/1              | +                     | GES-5, CTX-M-15, TEM-1B-like, SHV-1                  | ST101            |
| 4                                   | 945154233 | M              | 78          | 11-04-2013      | Sputum             | F/4              | -                     | GES-5, CTX-M-15, TEM-1B-like, SHV-1-like             | ST101            |
| 5                                   | 945165838 | M              | 62          | 25-06-2013      | Pus swab (leg)     | F/6              | +                     | GES-5, CTX-M-15, TEM-1B-like, SHV-1                  | ST101            |
| 6                                   | 945169659 | M              | 68          | 19-07-2013      | urine              | F/5              | +                     | GES-5, CTX-M-15, TEM-1B-like, SHV-12-like            | ST101            |
| 7                                   | 957083320 | F              | 69          | 21-07-2013      | Urine              | K/3              | +                     | GES-5, CTX-M-15, TEM-1B-like                         | ST101            |
| 8                                   | U44822    | X              | X           | X               | X                  | X                | +                     | GES-5, CTX-M-15, TEM-1B-like, SHV-11                 | ST101            |
| 9                                   | 957083896 | F              | 56          | 03-08-2013      | Urine              | K/1              | +                     | GES-5, CTX-M-15, TEM-1B-like, SHV-1-like             | ST101            |
| 10                                  | 957089165 | M              | 82          | 10-07-2013      | Pus swab (Trachea) | K/2              | -                     | GES-5, CTX-M-15, TEM-1B-like, SHV-11                 | ST101            |
| 11                                  | 960186733 | X              | X           | X               | X                  | X                | +                     | NDM-1, OXA-1, CTX-M-15-like, DHA-1-like, SHV-1       | ST101            |
| 12                                  | 950171785 | M              | 86          | X               | Urine              | X (surgical)     | +                     | NDM-1, OXA-1, CTX-M-15-like, DHA-1-like, SHV-1       | ST101            |
| 13                                  | 950173000 | M              | 53          | X               | Urine              | X (ICU)          | +                     | NDM-1, OXA-1, CTX-M-15-like, DHA-1-like, SHV-1       | ST101            |
| 14                                  | 951373950 | M              | 79          | 03-07-2013      | Blood culture      | B/3              | +                     | NDM-1, OXA-1-like, CTX-M-15-like, DHA-1-like, SHV-1  | ST101            |
| 15                                  | 951362657 | M              | 55          | X               | X                  | X (ICU)          | +                     | NDM-1, OXA-1, CTX-M-15-like, DHA-1-like, SHV-1       | ST2016           |
| 16                                  | 951384356 | M              | 39          | 26-08-2013      | Catheter tip       | B/1              | +                     | NDM-1, OXA-1-like, CTX-M-15-like, DHA-1-like, SHV-1, | ST101            |
| 17                                  | 951363981 | M              | 55          | 04-04-2013      | Urine              | B/2              | +                     | NDM-1, OXA-1-like, CTX-M-15, DHA-1-like, SHV-1       | ST101            |
| 18                                  | 950142398 | M              | 53          | 07-05-2013      | Tracheal fluid     | E/1              | +                     | NDM-1, OXA-1, OXA-9, CTX-M-15, TEM-1A, SHV-1         | ST2017           |
| 19                                  | 941530379 | F              | 57          | X               | Urine              | X (ICU)          | +                     | NDM-1, OXA-1, CTX-M-15, TEM-1B, SHV-99-like          | ST323            |
| 20                                  | 950117510 | F              | 24          | 23-12-2012      | Urine              | E/1              | +                     | NDM-1, OXA-1, OXA-9, CTX-M-15, TEM-1A, SHV-1         | ST2017           |
| 21                                  | 950118422 | F              | 54          | 12-12-2012      | Abdominal swab     | E/3              | +                     | NDM-1, OXA-1, OXA-9, CTX-M-15, TEM-1A, SHV-1         | ST2017           |
| 22                                  | 939997103 | M              | 70          | 09/02/2013      | Art line           | G/2              | +                     | CTX-M-15, LEN16-like                                 | ST1478           |
| <i>K. michiganensis</i> (n=1)       |           |                |             |                 |                    |                  |                       |                                                      |                  |
| 23                                  | 939742031 | M              | 39          | X               | Urine              | G/3 (outpatient) | +                     | NDM-1, CTX-M-3, TEM-1B, OXY-1-4-like                 | ST170            |
| <i>Serratia marcescens</i> (n=12)   |           |                |             |                 |                    |                  |                       |                                                      |                  |
| 24                                  | 950005607 | F              | 9 months    | X               | Sputum             | E/1 (ICU)        | +                     | NDM-1, OXA-1, OXA-10, CTX-M-15, TEM-63-like          | NA <sup>††</sup> |
| 25                                  | 950196656 | F              | 67          | X               | Blood              | E/1 (ICU)        | +                     | NDM-1, OXA-1, OXA-10-like, TEM-1B                    | NA               |

\* Isolate taxonomy as determined by NCBI using the average nucleotide identity test (ANI) (Federhen, S *et al.*, 2015, DOI: 10.1186/s40793-016-0134-1).

† Carba NP test for detection of carbapenemase activity (+); negative result (-).

‡ Male

§ Female

\*\* Missing data

†† MLST is not available for this species.

|                                                       |            |   |          |            |                             |                |   |                                                  |       |
|-------------------------------------------------------|------------|---|----------|------------|-----------------------------|----------------|---|--------------------------------------------------|-------|
| 26                                                    | 950163360  | M | 40       | X          | Blood                       | E/1 (ICU)      | + | NDM-1, OXA-10, TEM-1B                            | NA    |
| 27                                                    | 950164094  | M | 42       | X          | Tracheal fluid              | E/1 (ICU)      | + | NDM-1, OXA-1, OXA-10, CTX-M-15, TEM-1B           | NA    |
| 28                                                    | 950165859  | X | X        | X          | X                           | E/1 (ICU)      | + | NDM-1, OXA-1, OXA-10, CTX-M-11-like, TEM-1B-like | NA    |
| 29                                                    | 950166381  | M | 57       | X          | CVP Tip                     | E/1 (ICU)      | + | NDM-1, OXA-1, OXA-10, CTX-M-15, TEM-63-like      | NA    |
| 30                                                    | 950174583  | M | 41       | X          | CVP Tip                     | E/1 (ICU)      | + | NDM-1, OXA-1, OXA-10, CTX-M-15, TEM-63-like      | NA    |
| 31                                                    | 950172946  | F | 48       | X          | Blood                       | E/1 (ICU)      | + | NDM-1, OXA-10, TEM-1B                            | NA    |
| 32                                                    | 9501453777 | X | X        | X          | X                           | E/1 (ICU)      | + | NDM-1, OXA-10, TEM-1B,                           | NA    |
| 33                                                    | 945154301  | F | 66       | 18/4/13    | Urine                       | F1             | + | NDM-1                                            | NA    |
| 34                                                    | 945174350  | M | 56       | X          | Urine                       | F7 (Neuronal)  | + | NDM-1, TEM-1B, CTX-M-3                           | NA    |
| 35                                                    | 946252515  | F | 59       | 24/3/13    | Tracheal fluid              | B2             | - | OXA-10, TEM-1B, CTX-M-15                         | NA    |
| <i>Enterobacter asburiae</i> (n=2)                    |            |   |          |            |                             |                |   |                                                  |       |
| 36                                                    | 19870317   | F | 7        | X          | Urine                       | X (paediatric) | + | NDM-1, CTX-M-3, ACT-3                            | ST252 |
| 37                                                    | 939705067  | F | 17       | 28/03/2013 | Urine                       | G/1            | + | NDM-1, TEM-1B, ACT-1                             | ST435 |
| <i>E. cloacae</i> (n=2)                               |            |   |          |            |                             |                |   |                                                  |       |
| 38                                                    | 941726609  | M | 2 months | X          | CVP Tip                     | X (nursery)    | - | OXA-1, CTX-M-15, TEM-1B, , ACT-7-like            | ST108 |
| 39                                                    | 951358951  | F | 59       | 24/03/2013 | Cardiovascular puncture tip | B/2            | - | CTX-M-3                                          | ST436 |
| <i>E. cloacae</i> complex "Hoffman cluster III" (n=1) |            |   |          |            |                             |                |   |                                                  |       |
| 40                                                    | 950180354  | F | 57       | X          | Urine                       | X ICU)         | + | NDM-1, OXA-1, CTX-M-15, TEM-1B, ACT-14-like      | ST145 |
| <i>E. cloacae</i> complex "Hoffman cluster IV" (n=1)  |            |   |          |            |                             |                |   |                                                  |       |
| 41                                                    | 953102574  | M | 34       | 24/04/2013 | Abdominal fluid             | A/3            | + | NDM-1, TEM-1B, SHV-12, MIR-1-like                | ST433 |
| <i>E. kobei</i> (n=2)                                 |            |   |          |            |                             |                |   |                                                  |       |
| 42                                                    | 941713674  | F | 3        | 22/06/2013 | Urine                       | H/1            | + | NDM-1, OXA-1, CTX-M-15                           | ST54  |
| 43                                                    | 953099839  | M | 41       | 27/03/2013 | ETA                         | A/1            | + | NDM-1, TEM-1B, SHV-12                            | ST434 |
| <i>Enterobacter</i> spp. (n=1)                        |            |   |          |            |                             |                |   |                                                  |       |
| 44                                                    | 950178628  | F | 57       | X          | Urine                       | X (surgical)   | + | NDM-1, OXA-1, CTX-M-15, TEM-1B, ACT-7-like       | ST121 |
| <i>Citrobacter freundii</i> (n=1)                     |            |   |          |            |                             |                |   |                                                  |       |
| 45                                                    | 944526466  | M | 36       | 26/07/2013 | Catheter tip                | J/2            | + | NDM-1, CTX-M-3, TEM-1B, CMY-77-like              | ST63  |

**TABLE S2** Antibiotic susceptibility characteristics of the *Enterobacteriaceae* collection (n=45)

| Bacterial isolate*              |           |                       | MIC (mg/L) <sup>†</sup> |      |      |     |     |     |     |     |     |     |     |     |     |     |      |     |      |     |      |      |     |
|---------------------------------|-----------|-----------------------|-------------------------|------|------|-----|-----|-----|-----|-----|-----|-----|-----|-----|-----|-----|------|-----|------|-----|------|------|-----|
| No.                             | StrainID  | Category <sup>‡</sup> | GEN                     | TOB  | AMK  | TZP | ETP | IMP | MEM | DOR | CMX | CTX | CAZ | PEF | CZA | FOX | CIP  | SXT | TGC  | ATM | AMC  | FOF  | CST |
| <i>Escherichia coli</i>         |           |                       |                         |      |      |     |     |     |     |     |     |     |     |     |     |     |      |     |      |     |      |      |     |
| 1                               | 947385799 | MDR                   | 1                       | <0.5 | <1   | >64 | >4  | 16  | 16  | >4  | >16 | >16 | >32 | >16 | >32 | >32 | >32  | >16 | 1    | >16 | >128 | <2   | 0.5 |
| <i>Klebsiella pneumoniae</i>    |           |                       |                         |      |      |     |     |     |     |     |     |     |     |     |     |     |      |     |      |     |      |      |     |
| 2                               | 944535499 | MDR                   | 0.5                     | 8    | 2    | >64 | >4  | 8   | >16 | >4  | >16 | >16 | >32 | >16 | 8   | >32 | >32  | >16 | 0.5  | >16 | >128 | 16   | >8  |
| 3                               | 939996824 | MDR                   | 128                     | 32   | <1   | >64 | >4  | >32 | >16 | >4  | >16 | >16 | 8   | 16  | 0.5 | >32 | >32  | 4   | 2    | >16 | >128 | 128  | 0.5 |
| 4                               | 945154233 | MDR                   | 256                     | 32   | 2    | >64 | >4  | >32 | >16 | >4  | >16 | >16 | >32 | >16 | 2   | >32 | >32  | >16 | 0.5  | >16 | >128 | 32   | 0.5 |
| 5                               | 945165838 | MDR                   | 256                     | 32   | <1   | >64 | >4  | >32 | >16 | >4  | >16 | >16 | 16  | >16 | 1   | >32 | >32  | >16 | 0.5  | >16 | >128 | 64   | 0.5 |
| 6                               | 945169659 | MDR                   | 128                     | 32   | 2    | >64 | >4  | 8   | 16  | >4  | >16 | >16 | >32 | >16 | 2   | >32 | >32  | >16 | 0.5  | >16 | >128 | 16   | 0.5 |
| 7                               | 957083320 | MDR                   | 128                     | 32   | 4    | >64 | >4  | >32 | >16 | >4  | >16 | >16 | >32 | >16 | 1   | >32 | >32  | >16 | 2    | >16 | >128 | 32   | 0.5 |
| 8                               | U44822    | MDR                   | 64                      | 64   | 16   | >64 | >4  | 8   | 16  | >4  | >16 | >16 | >32 | >16 | 2   | >32 | >32  | >16 | 0.5  | >16 | >128 | 8    | 0.5 |
| 9                               | 957083896 | MDR                   | 256                     | 64   | 4    | >64 | >4  | >32 | >16 | >4  | >16 | >16 | >32 | >16 | 2   | >32 | >32  | >16 | 0.5  | >16 | >128 | 32   | 0.5 |
| 10                              | 957089165 | MDR                   | 128                     | 64   | 8    | >64 | >4  | >32 | >16 | >4  | >16 | >16 | >32 | >16 | 2   | >32 | >32  | >16 | 0.5  | >16 | >128 | 32   | 0.5 |
| 11                              | 960186733 | XDR                   | >256                    | >256 | >256 | >64 | >4  | 4   | 4   | 4   | >16 | >16 | >32 | >16 | >32 | >32 | >32  | >16 | 0.5  | >16 | >128 | >128 | 0.5 |
| 12                              | 950171785 | MDR                   | >256                    | 256  | >256 | >64 | >4  | 2   | 2   | 4   | >16 | >16 | >32 | >16 | >32 | >32 | >32  | >16 | 0.5  | >16 | >128 | >128 | 0.5 |
| 13                              | 950173000 | XDR                   | >256                    | >256 | >256 | >64 | 4   | 2   | 2   | 2   | >16 | >16 | >32 | >16 | >32 | >32 | >32  | >16 | 0.5  | >16 | >128 | >128 | 0.5 |
| 14                              | 951373950 | XDR                   | >256                    | >256 | >256 | >64 | >4  | 1   | 2   | 2   | >16 | >16 | >32 | >16 | >32 | >32 | >32  | >16 | 1    | >16 | >128 | >128 | 0.5 |
| 15                              | 951362657 | MDR                   | >256                    | >256 | >256 | >64 | >4  | 1   | 2   | 4   | >16 | >16 | >32 | >16 | >32 | >32 | >32  | >16 | 0.5  | >16 | >128 | >128 | 0.5 |
| 16                              | 951384356 | XDR                   | >256                    | >256 | >256 | >64 | >4  | 4   | 4   | >4  | >16 | >16 | >32 | >16 | >32 | >32 | >32  | >16 | 1    | >16 | >128 | >128 | 0.5 |
| 17                              | 951363981 | XDR                   | >256                    | >256 | >256 | >64 | >4  | 4   | 8   | 4   | >16 | >16 | >32 | >16 | >32 | >32 | >32  | >16 | 0.5  | >16 | >128 | >128 | 0.5 |
| 18                              | 950142398 | MDR                   | >256                    | >256 | >256 | >64 | >4  | 8   | 16  | >4  | >16 | >16 | >32 | >16 | >32 | >32 | >32  | >16 | 0.5  | >16 | >128 | 8    | 0.5 |
| 19                              | 941530379 | MDR                   | >256                    | >256 | >256 | >64 | >4  | 8   | 16  | >4  | >16 | >16 | >32 | >16 | >32 | >32 | 0.12 | >16 | 0.25 | >16 | >128 | 4    | 0.5 |
| 20                              | 950117510 | MDR                   | >256                    | >256 | >256 | >64 | >4  | 8   | 8   | >4  | >16 | >16 | >32 | >16 | >32 | >32 | >32  | >16 | 1    | >16 | >128 | 16   | 0.5 |
| 21                              | 950118422 | MDR                   | >256                    | >256 | >256 | >64 | >4  | 8   | 16  | >4  | >16 | >16 | >32 | >16 | >32 | >32 | >32  | >16 | 1    | >16 | >128 | 8    | 0.5 |
| 22                              | 939997103 | MDR                   | 1                       | 8    | 8    | >64 | >4  | 2   | 8   | 4   | >16 | >16 | >32 | >16 | 2   | >32 | 8    | >16 | 0.5  | >16 | >128 | 64   | 0.5 |
| <i>Klebsiella michiganensis</i> |           |                       |                         |      |      |     |     |     |     |     |     |     |     |     |     |     |      |     |      |     |      |      |     |
| 23                              | 939742031 | MDR                   | >256                    | >256 | >256 | >64 | >4  | 4   | 4   | 4   | >16 | >16 | >32 | 16  | >32 | >32 | >32  | >16 | 0.5  | 8   | >128 | 8    | 0.5 |

\* Taxonomy determined by NCBI by comparing to proxytype strains in GenBank using the average nucleotide identity (ANI) test (Federhen, S *et al.*, 2015, DOI: 10.1186/s40793-016-0134-1).

<sup>†</sup>EUCAST resistant breakpoints (v 7.1) are used. Abbreviations are used for all antibacterial agents as follows: GEN=gentamicin (R>4mg/L); TOB= tobramycin (R>4mg/L); AMK=amikacin (R>16mg/L); TZP=piperacillin-tazobactam (R>16mg/L); ETP=ertapenem (R>1mg/L); IMI=imipenem (R>8mg/L); MEM=meropenem (R>8mg/L); DOR=doripenem (R>2mg/L); CMX= cefuroxime (R>8mg/L); CTX=cefotaxime (R>2mg/L); CAZ=ceftazidime (R>4mg/L); FEP=cefepime (R>4mg/L); CZA=ceftazidime-avibactam (R>8mg/L); FOX=cefoxitin (R>8mg/L); CIP=ciprofloxacin (R>0.5 mg/L); SXT=trimethoprim-sulfamethoxazole (R>4mg/L); TGC=tigecycline (R>2mg/L); ATM=aztreonam (R>4mg/L); AMC=amoxicillin-clavulanic acid (R>8mg/L); FOF=fosfomycin (R>32mg/L); CST=colistin (R>2mg/L)

<sup>‡</sup> Categorized as MDR, XDR or PDR according to standard criteria (Magiorakos, A *et al.*, 2012, DOI: 10.1111/j.1469-0691.2011.03570.x ).

*Serratia marcescens*

|    |            |     |      |      |      |     |    |     |     |    |     |     |     |     |     |     |     |     |   |       |      |      |    |
|----|------------|-----|------|------|------|-----|----|-----|-----|----|-----|-----|-----|-----|-----|-----|-----|-----|---|-------|------|------|----|
| 24 | 950005607  | PDR | >256 | >256 | >256 | >64 | >4 | >32 | >16 | >4 | >16 | >16 | >32 | >16 | >32 | >32 | 32  | >16 | 4 | >16   | >128 | 64   | >8 |
| 25 | 950196656  | PDR | >256 | >256 | >256 | 64  | >4 | >32 | >16 | >4 | >16 | >16 | >32 | >16 | >32 | >32 | 32  | >16 | 4 | <0.12 | >128 | 64   | >8 |
| 26 | 950163360  | XDR | >256 | >256 | >256 | 64  | >4 | 16  | >16 | >4 | >16 | >16 | >32 | >16 | >32 | >32 | 16  | >16 | 8 | 1     | >128 | 32   | >8 |
| 27 | 950164094  | PDR | >256 | >256 | >256 | >64 | >4 | >32 | >16 | >4 | >16 | >16 | >32 | >16 | >32 | >32 | 32  | >16 | 8 | >16   | >128 | >128 | >8 |
| 28 | 950165859  | PDR | >256 | >256 | >256 | 64  | >4 | >32 | >16 | >4 | >16 | >16 | >32 | >16 | >32 | >32 | >32 | >16 | 4 | >16   | >128 | 128  | >8 |
| 29 | 950166381  | PDR | >256 | >256 | >256 | >64 | >4 | >32 | >16 | >4 | >16 | >16 | >32 | >16 | >32 | >32 | >32 | >16 | 8 | >16   | >128 | 128  | >8 |
| 30 | 950174583  | PDR | >256 | >256 | >256 | 64  | >4 | >32 | >16 | >4 | >16 | >16 | >32 | >16 | >32 | >32 | 32  | >16 | 4 | >16   | >128 | 128  | >8 |
| 31 | 950172946  | XDR | >256 | >256 | >256 | 32  | >4 | >32 | >16 | >4 | >16 | >16 | >32 | >16 | >32 | >32 | 8   | >16 | 8 | 0.5   | >128 | 128  | >8 |
| 32 | 9501453777 | XDR | >256 | >256 | >256 | >64 | >4 | >32 | >16 | >4 | >16 | >16 | >32 | >16 | >32 | >32 | 16  | >16 | 8 | 0.5   | >128 | 64   | >8 |
| 33 | 945154301  | MDR | >256 | >256 | >256 | >64 | >4 | 8   | 4   | 4  | >16 | >16 | >32 | >16 | >32 | >32 | 4   | 2   | 2 | <0.12 | >128 | 16   | >8 |
| 34 | 945174350  | XDR | >256 | >256 | >256 | >64 | >4 | 16  | 4   | >4 | >16 | >16 | >32 | >16 | >32 | >32 | 16  | >16 | 2 | 8     | >128 | 16   | >8 |
| 35 | 946252515  | MDR | 32   | 32   | 8    | >64 | >4 | 1   | 16  | >4 | >16 | >16 | >32 | >16 | 2   | >32 | 8   | 2   | 8 | >16   | >128 | >128 | >8 |

*Enterobacter asburiae*

|    |             |     |      |      |      |     |    |     |     |    |     |     |     |     |     |     |    |     |   |   |      |      |    |
|----|-------------|-----|------|------|------|-----|----|-----|-----|----|-----|-----|-----|-----|-----|-----|----|-----|---|---|------|------|----|
| 36 | 19870317JSK | MDR | >256 | >256 | >256 | >64 | >4 | 16  | >16 | >4 | >16 | >16 | >32 | >16 | >32 | >32 | 2  | >16 | 1 | 8 | >128 | <2   | 1  |
| 37 | 939705067   | XDR | >256 | >256 | >256 | >64 | >4 | >32 | >16 | >4 | >16 | >16 | >32 | >16 | >32 | >32 | 32 | >16 | 1 | 1 | >128 | >128 | >8 |

*Enterobacter cloacae*

|    |           |     |     |      |    |     |    |    |   |    |     |     |     |     |   |     |      |     |     |     |      |    |     |
|----|-----------|-----|-----|------|----|-----|----|----|---|----|-----|-----|-----|-----|---|-----|------|-----|-----|-----|------|----|-----|
| 38 | 941726609 | MDR | 64  | 32   | 4  | >64 | >4 | 2  | 2 | 1  | >16 | >16 | >32 | >16 | 4 | >32 | 32   | >16 | 4   | >16 | >128 | <2 | 0.5 |
| 39 | 951358951 |     | 0.5 | <0.5 | <1 | >64 | >4 | 16 | 8 | >4 | >16 | >16 | >32 | >16 | 8 | >32 | 0.06 | >16 | 0.5 | >16 | >128 | <2 | 0.5 |

*Enterobacter cloacae* complex "Hoffmancluster III"

|    |           |     |      |      |      |     |    |   |    |    |     |     |     |     |     |     |   |     |     |     |      |   |     |
|----|-----------|-----|------|------|------|-----|----|---|----|----|-----|-----|-----|-----|-----|-----|---|-----|-----|-----|------|---|-----|
| 40 | 950180354 | MDR | >256 | >256 | >256 | >64 | >4 | 8 | 16 | >4 | >16 | >16 | >32 | >16 | >32 | >32 | 4 | >16 | 0.5 | >16 | >128 | 8 | 0.5 |
|----|-----------|-----|------|------|------|-----|----|---|----|----|-----|-----|-----|-----|-----|-----|---|-----|-----|-----|------|---|-----|

*Enterobacter cloacae* complex "Hoffmancluster IV"

|    |           |     |      |      |      |     |    |    |    |    |     |     |     |     |     |     |    |     |   |     |      |    |    |
|----|-----------|-----|------|------|------|-----|----|----|----|----|-----|-----|-----|-----|-----|-----|----|-----|---|-----|------|----|----|
| 41 | 953102574 | XDR | >256 | >256 | >256 | >64 | >4 | 16 | 16 | >4 | >16 | >16 | >32 | >16 | >32 | >32 | 32 | >16 | 1 | >16 | >128 | 32 | >8 |
|----|-----------|-----|------|------|------|-----|----|----|----|----|-----|-----|-----|-----|-----|-----|----|-----|---|-----|------|----|----|

*Enterobacter kobei*

|    |           |     |      |      |      |     |    |     |     |    |     |     |     |     |     |     |    |     |      |     |      |      |     |
|----|-----------|-----|------|------|------|-----|----|-----|-----|----|-----|-----|-----|-----|-----|-----|----|-----|------|-----|------|------|-----|
| 42 | 941713674 | XDR | >256 | >256 | >256 | >64 | >4 | 16  | >16 | >4 | >16 | >16 | >32 | >16 | >32 | >32 | 2  | >16 | 0.25 | 16  | >128 | 64   | 0.5 |
| 43 | 953099839 | XDR | >256 | >256 | >256 | >64 | >4 | >32 | >16 | >4 | >16 | >16 | >32 | >16 | >32 | >32 | 16 | >16 | 1    | >16 | >128 | >128 | 0.5 |

*Enterobacter* spp.

|    |           |     |      |      |      |     |    |   |   |    |     |     |     |     |     |     |     |     |   |     |      |    |     |
|----|-----------|-----|------|------|------|-----|----|---|---|----|-----|-----|-----|-----|-----|-----|-----|-----|---|-----|------|----|-----|
| 44 | 950178628 | MDR | >256 | >256 | >256 | >64 | >4 | 8 | 8 | >4 | >16 | >16 | >32 | >16 | >32 | >32 | >32 | >16 | 1 | >16 | >128 | 32 | 0.5 |
|----|-----------|-----|------|------|------|-----|----|---|---|----|-----|-----|-----|-----|-----|-----|-----|-----|---|-----|------|----|-----|

*Citrobacter freundii*

|    |           |     |      |      |      |     |    |    |    |    |     |     |     |     |     |     |    |     |   |    |      |    |     |
|----|-----------|-----|------|------|------|-----|----|----|----|----|-----|-----|-----|-----|-----|-----|----|-----|---|----|------|----|-----|
| 45 | 944526466 | MDR | >256 | >256 | >256 | >64 | >4 | 16 | 16 | >4 | >16 | >16 | >32 | >16 | >32 | >32 | 32 | >16 | 1 | 16 | >128 | <2 | 0.5 |
|----|-----------|-----|------|------|------|-----|----|----|----|----|-----|-----|-----|-----|-----|-----|----|-----|---|----|------|----|-----|
